# Supplementary material for: Synthesis and characterization of magnetic mesoporous Fe3O4@mSiO2–DODGA nanoparticles for adsorption of 16 rare earth elements
Source: Royal Society of Chemistry journal article supplement (doi:10.1039/c8ra07762b), 2018-01-01
Supplement: c8ra07762b1.pdf [file c8ra07762b1.pdf]

## Supporting information

### Synthesis and characterization of magnetic mesoporous nanoparticles Fe<sub>3</sub>O<sub>4</sub>@mSiO<sub>2</sub>- DODGA for adsorption of 16 rare earth elements

Jingrui Li<sup>a,b</sup>, Aijun Gong<sup>a,b\*</sup>, Fukai Li<sup>a,b</sup>, Lina Qiu<sup>a,b</sup>, Weiwei Zhang<sup>a,b</sup>,

Ge Gao<sup>a,b</sup>, Yu Liu<sup>a,b</sup>, Jiandi Li<sup>a,b</sup>

a. School of chemistry and biological engineering, University of Science and Technology Beijing,  
Beijing 100083, China

b. Beijing Key Laboratory for Science and Application of Functional Molecular and Crystalline Materials,  
University of Science and Technology Beijing, Beijing 100083, China

Corresponding Author

\* Email: Gongaijun5661@ustb.edu.cn. Tel: (+86) 010-82375661. Fax: (+86) 010-62334071

|                                                                                                                             |    |
|-----------------------------------------------------------------------------------------------------------------------------|----|
| Figure S1. The mass spectra of DODGA                                                                                        | 2  |
| Figure S2. The mass spectra of glycolic anhydride                                                                           | 2  |
| Figure S3. The <sup>1</sup> H NMR spectra of DODGA                                                                          | 3  |
| Figure S4. The <sup>1</sup> H NMR spectra of glycolic anhydride                                                             | 3  |
| Figure S5. The <sup>13</sup> C NMR spectra of DODGA                                                                         | 4  |
| Figure S6. The <sup>13</sup> C NMR spectra of glycolic anhydride                                                            | 4  |
| Table S1. The pseudo-first order kinetic model                                                                              | 5  |
| Table S2. The pseudo-second-order model                                                                                     | 5  |
| Table S3. The intra-particle diffusion model                                                                                | 6  |
| Table S4. The Elovich model                                                                                                 | 6  |
| Table S5. The Langmuir model                                                                                                | 7  |
| Table S6. The Freundlich model                                                                                              | 8  |
| Table S7. The Tempkin model                                                                                                 | 8  |
| Table S8. The D-R model                                                                                                     | 9  |
| Table S9. 16 kinds of REEs linear standard curve                                                                            | 10 |
| Table S10. Comparison of the Fe <sub>3</sub> O <sub>4</sub> @mSiO <sub>2</sub> -DODGA with the other conventional materials | 12 |
| Figure S8. The pore diameter of Fe <sub>3</sub> O <sub>4</sub> @mSiO <sub>2</sub> -DODGA                                    | 12 |
| Figure S9. The pore structure of Fe <sub>3</sub> O <sub>4</sub> @SiO <sub>2</sub>                                           | 12 |

## Material preparation

### Synthesis of $\text{Fe}_3\text{O}_4@m\text{SiO}_2@\text{NH}_2$

$\text{Fe}_3\text{O}_4$  magnetic nanoparticles were synthesized by solvothermal reaction according to the literature<sup>1</sup>. Typically,  $\text{FeCl}_3$  (6 m mol, 1.62 g) and carbamide (30 m mol, 1.80 g) were dissolved in ethylene glycol (58mL) and water (2mL). The obtained mixture was stirred vigorously at room temperature for 30 min and added subsequently into a Teflon-lined stainless autoclave. The autoclave was sealed and placed in a muffle furnace. The increasing temperature programmed was set from room temperature to 200 °C in 1 h and remained 200 °C for 16 h, followed by cooling to room temperature. The black precipitate was collected by an external magnetic field and purified by washing sequentially with ethanol and ultrapure water for three times, respectively.

The  $\text{Fe}_3\text{O}_4@\text{SiO}_2$  particles were synthesized according to the reported method<sup>2,3</sup>. Briefly,  $\text{Fe}_3\text{O}_4$  magnetic nanoparticles (0.3 g) was added into a mixed solution of ethanol (160 mL) and ultrapure water (40 mL). The dispersion mixture was sonicated for 30 min to make the nanoparticles disperse evenly. After that, the concentrated ammonia aqueous solution (5 mL, 25 wt%) and TEOS (3.1 m mol, 0.7 mL) was added to make sol-gel reaction occurred on the surface of the particles. The mixture was stirring for 8 h at 40 °C. Finally, the  $\text{Fe}_3\text{O}_4@\text{SiO}_2$  particles were separated and washed with ethanol and ultrapure water respectively, dried under vacuum.

The mesoporous  $\text{SiO}_2$  layer coated on  $\text{SiO}_2$  shell was prepared with the following method. Typically,  $\text{Fe}_3\text{O}_4@\text{SiO}_2$  particles (0.4 g) was added into a mixed solution of ethanol (30 mL) and ultrapure water (20 mL). The dispersion mixture was sonicated for 10 min. the concentrated ammonia aqueous solution (1 mL, 28 wt%), CTAB(0.9 g) and TEOS (9 mmol, 2.0 mL) was added subsequently. The mixture was stirring for 10 h at room temperature. The  $\text{Fe}_3\text{O}_4@m\text{SiO}_2$  particles were separated and washed with ethanol and ultrapure water. To remove CTAB<sup>4</sup>, the obtained  $\text{Fe}_3\text{O}_4@m\text{SiO}_2$  particles were added into a mixed solution of ethanol (150 mL) and  $\text{NH}_4\cdot\text{NO}_3$  (0.9 g). The mixture was refluxed for 3 h.

Amine functionalization nanoparticles  $\text{Fe}_3\text{O}_4@m\text{SiO}_2@\text{NH}_2$  were prepared by reacting with APTES<sup>5</sup>. Briefly, anhydrous toluene (50 mL) and  $\text{Fe}_3\text{O}_4@m\text{SiO}_2$  particles (0.4 g) were added in a three-neck flask. The mixture was sonicated for 30min to make the particles disperse. APTES (4 mL) was added into the flask. The reaction was going on under nitrogen gas protection at 120 °C for 24 h. The resultant  $\text{Fe}_3\text{O}_4@m\text{SiO}_2@\text{NH}_2$  nanoparticles were washed with anhydrous toluene and acetone for three times, respectively, and dried under vacuum.

### Synthesis of DODGA-Cl

The synthesis of DODGA-Cl was referred the literature<sup>6,7</sup>. Diglycolic acid (37.3 mM, 5.0 g) was dissolved in acid anhydride (132.2 mM, 12.5mL) under a nitrogen atmosphere. The mixture was stirred and heated to reflux. After refluxing for 10 min, 3 drops of

phosphoric acid were added into the reaction mixture to catalysis the reaction. The solution was stirred under reflux conditions for 2 hour. The resulting solution was concentrated through rotary evaporation under reduced pressure. The final solution was poured into the toluene to recrystallize the products. After filtrating the solid generated in toluene, a white needle-like product (3.6 g, 83% yield) was obtained to be used directly in the next synthesis step.

In the second step<sup>8</sup>, didoethylamine (16.0 m mol, 3.86 g) was placed in a 250 ml round bottom flask and dissolved in DCM (150 ml), glycolic anhydride (22.4 m mol, 2.62 g) was added, and the mixture was stirred at room temperature for 2 h. The end of the reaction was controlled by TLC (DCM/MeOH 8:2). The mixture was concentrated; and the residue was taken up in ethyl acetate, washed successively with 0.1N HCl (×2) and sat. NaCl, and dried over Na<sub>2</sub>SO<sub>4</sub>. Evaporation of the solvent gave the title compound as an oil which crystallized on standing (5.00 g, 87.5%).

Converting the DODGA-OH to its acyl chloride derivative was referred the normal organic reaction operation. Typically, DODGA-OH (10 m mol, 3.60 g) was dissolved in the solvent of CH<sub>2</sub>Cl<sub>2</sub> (30 mL). Anhydrous oxalyl chloride( 15 m mol, 1.3mL) was added into the mixture. After stirring for 10 min, 2 drops of DMF was added to catalyze the reaction. The reaction was monitored by thin layer chromatography. At the end of the reaction, the solvent and excessive oxalyl chloride was removed by rotary evaporating. The residue was DODGA-Cl (3.30 g, 87.2%) that could be used directly to modify magnetic particles.

#### **Modifying the Fe<sub>3</sub>O<sub>4</sub> particles with the functional unit of DODGA**

The functionalized Fe<sub>3</sub>O<sub>4</sub> particles were prepared by the reaction between the anime groups on the surface of the Fe<sub>3</sub>O<sub>4</sub>@mSiO<sub>2</sub>@NH<sub>2</sub> and the DODGA-Cl. Briefly, the Fe<sub>3</sub>O<sub>4</sub>@mSiO<sub>2</sub>@NH<sub>2</sub>( 0.3 g) and TEA( 15 m mol, 2.1 mL) was added into the solvent of anhydrous CH<sub>2</sub>Cl<sub>2</sub> ( 30 mL). The mixture was sonicated for 15min. the solution of DODGA-Cl (10 m mol, 3.75 g) in anhydrous CH<sub>2</sub>Cl<sub>2</sub> (10 mL) was dropped slowly into the mixture. The reaction was going on at room temperature for 8 h. The resultant particles were washed with CH<sub>2</sub>Cl<sub>2</sub> and methanol three times respectively, and dried under vacuum.

TOGDA #13 RT: 0.20 AV: 1 NL: 1.45E5  
T: ITMS + c ESI Full ms [110.00-500.00]

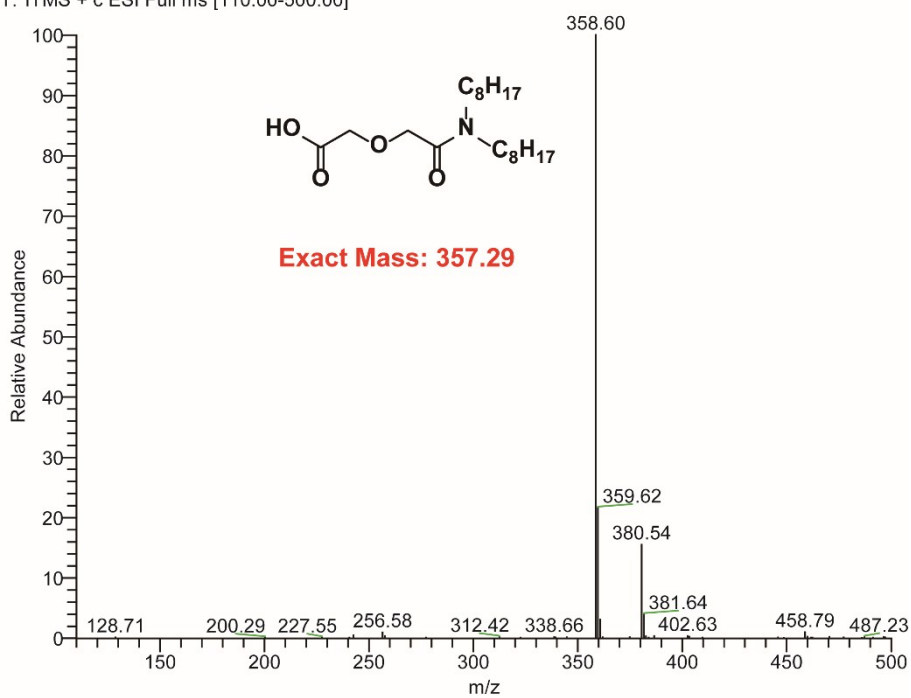

Figure S1. The mass spectra of DODGA

二甘醇酸 #13 RT: 0.21 AV: 1 NL: 7.13E3  
T: ITMS + c ESI Full ms [110.00-150.00]

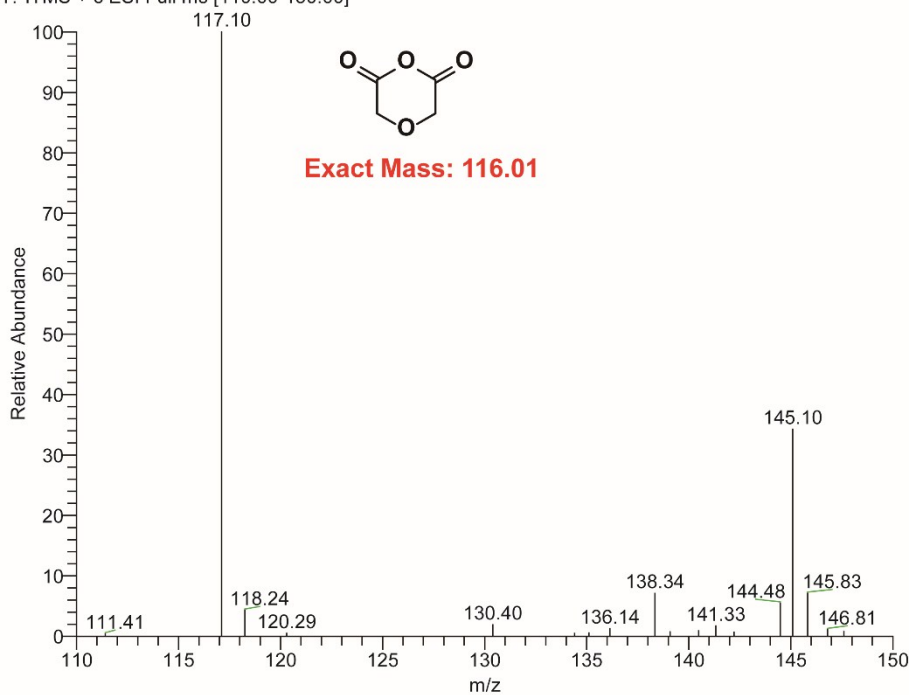

Figure S2. The mass spectra of Glycolic anhydride

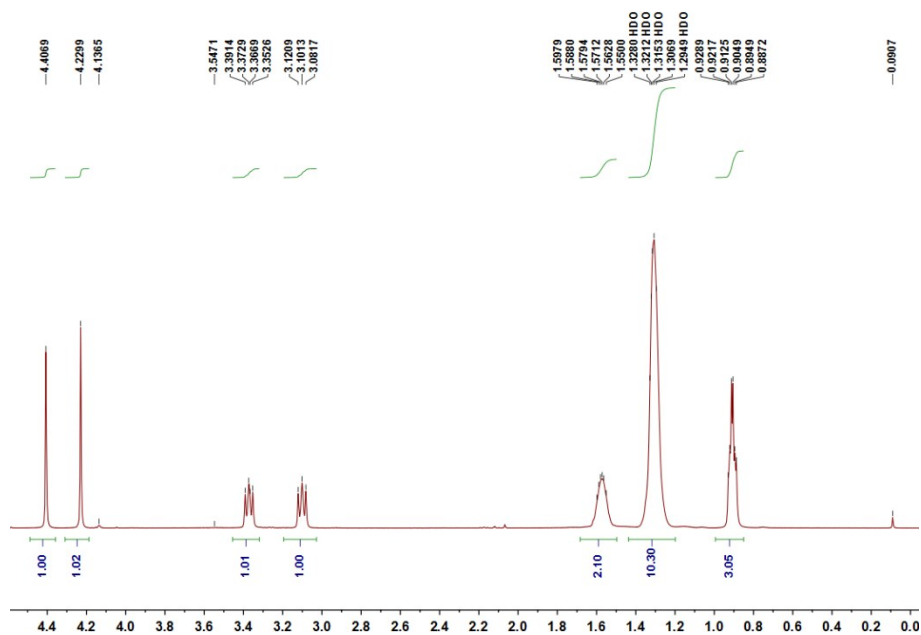

Figure S3. The  $^1\text{H}$  NMR spectra of DODGA  
 $^1\text{H}$  NMR (400 MHz, Chloroform-*d*)  $\delta$  4.41 (s, 1H), 4.23 (s, 1H), 3.37 (dd,  $J = 9.0, 6.6$  Hz, 1H), 3.19-3.03 (m, 1H), 1.68-1.50 (m, 2H), 1.31 (s, 10H), 0.91 (td,  $J = 6.8, 3.0$  Hz, 3H).

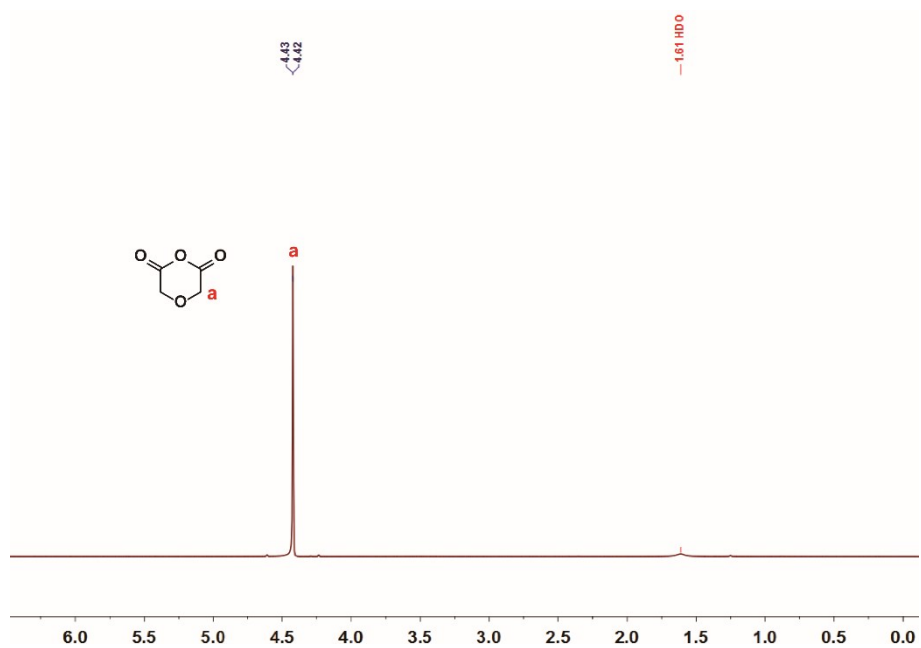

Figure S4. The  $^1\text{H}$  NMR spectra of Glycolic anhydride  
 $^1\text{H}$  NMR (400 MHz, Chloroform-*d*)  $\delta$  4.42 (d,  $J = 1.4$  Hz, 4H).

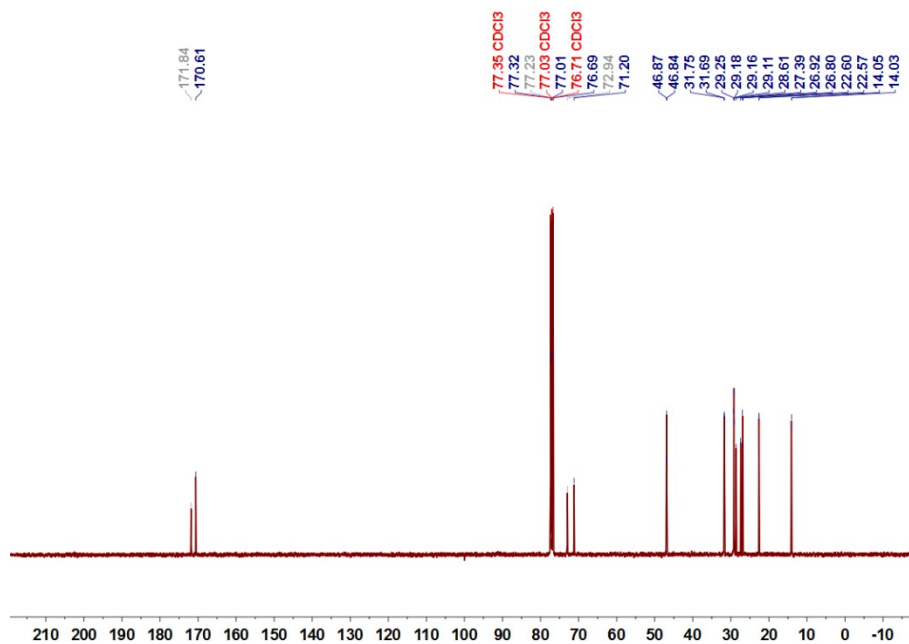

Figure S5. The  $^{13}\text{C}$  NMR spectra of DODGA

$^{13}\text{C}$  NMR (101 MHz,  $\text{CDCl}_3$ )  $\delta$  171.84, 170.61, 72.94, 71.20, 46.87, 46.84, 31.75, 31.69, 29.25, 29.18, 29.16, 29.11, 28.61, 27.39, 26.92, 26.80, 22.60, 22.57, 14.05, 14.03. MS (ESI): calcd. for  $\text{C}_{20}\text{H}_{39}\text{NO}_4$ : 357.29; found:358.60.

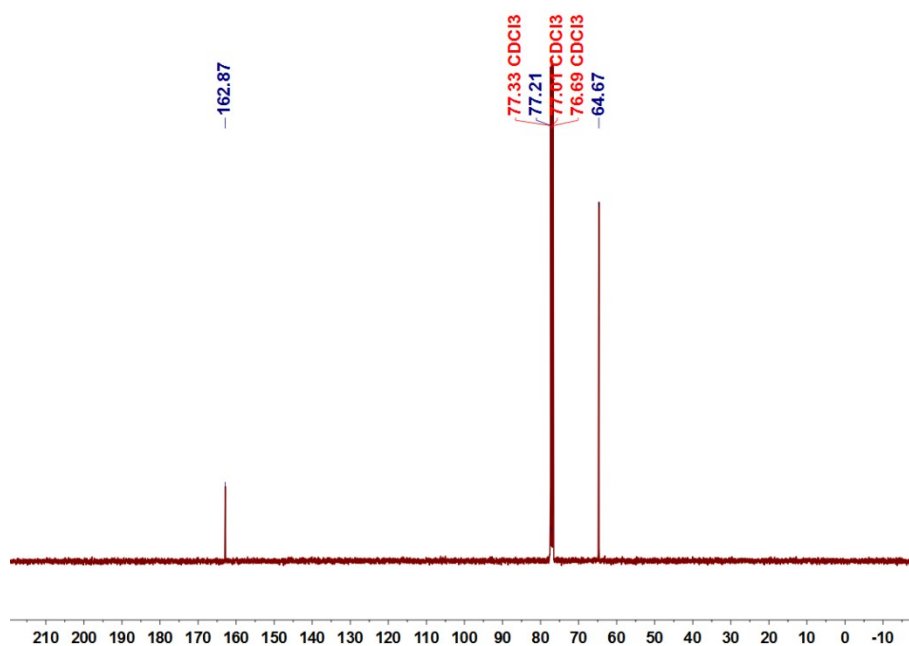

Figure S6. The  $^{13}\text{C}$  NMR spectra of Glycolic anhydride

$^{13}\text{C}$  NMR (101 MHz, Chloroform-*d*)  $\delta$  162.87, 64.67. MS (ESI): calcd. for  $\text{C}_4\text{H}_4\text{O}_4$ : 116.01; found:117.10.

## Adsorption kinetics

### Pseudo-first order kinetic model<sup>9</sup>

$$q_t = q_e(1 - e^{-k_1 t})$$

Where  $q_e(\text{mg}\cdot\text{g}^{-1})$  and  $q_t(\text{mg}\cdot\text{g}^{-1})$  refer to the amounts of REEs adsorbed at equilibrium and designed time, respectively.  $k_1(\text{min}^{-1})$  Pseudo-first order reaction rate constant.

Table S1. The result of data processing according to pseudo-first order kinetic model

| Elements | Equation                                       | Parameter      |                                      |                                     |
|----------|------------------------------------------------|----------------|--------------------------------------|-------------------------------------|
|          |                                                | R <sup>2</sup> | q <sub>e</sub><br>mg·g <sup>-1</sup> | k <sub>1</sub><br>min <sup>-1</sup> |
| Nd       | q <sub>t</sub> =57.36(1-e <sup>-0.089t</sup> ) | 0.9000         | 57.362                               | 0.0891                              |
| Sm       | q <sub>t</sub> =26.65(1-e <sup>-0.066t</sup> ) | 0.9755         | 26.6529                              | 0.0665                              |
| Eu       | q <sub>t</sub> =35.40(1-e <sup>-0.188t</sup> ) | 0.7948         | 35.3960                              | 0.1882                              |
| Ho       | q <sub>t</sub> =16.43(1-e <sup>-0.093t</sup> ) | 0.9561         | 16.428                               | 0.0927                              |
| Yb       | q <sub>t</sub> =33.16(1-e <sup>-0.105t</sup> ) | 0.9761         | 33.1592                              | 0.1052                              |
| Lu       | q <sub>t</sub> =39.29(1-e <sup>-0.285t</sup> ) | 0.5491         | 39.2897                              | 0.2851                              |
| Y        | q <sub>t</sub> =15.60(1-e <sup>-0.103t</sup> ) | 0.9592         | 15.6051                              | 0.1032                              |
| Sc       | q <sub>t</sub> =13.85(1-e <sup>-0.088t</sup> ) | 0.9106         | 13.8479                              | 0.0881                              |

### Pseudo-second-order model<sup>10</sup>

$$\frac{t}{q_t} = \frac{1}{2k_2 q_e^2} + \frac{1}{q_e} t$$

Where  $k_2$  was pseudo-second-order reaction rate constant ( $\text{g}\cdot\text{mg}^{-1}\cdot\text{min}^{-1}$ ), the initial adsorption rate  $h(\text{mg}\cdot\text{g}^{-1}\cdot\text{min}^{-1})$  was calculated from the following equation:  $h=k_2 q_e^2$

Table S2. The result of data processing according to pseudo-second-order model

| Elements | Equation                         | Parameter      |                                      |                                                         |
|----------|----------------------------------|----------------|--------------------------------------|---------------------------------------------------------|
|          |                                  | R <sup>2</sup> | q <sub>e</sub><br>mg·g <sup>-1</sup> | k <sub>2</sub><br>g·mg <sup>-1</sup> ·min <sup>-1</sup> |
| Nd       | t/q <sub>t</sub> =0.1484+0.0162t | 0.9997         | 61.7584                              | 282.7313                                                |
| Sm       | t/q <sub>t</sub> =0.3136+0.0357t | 0.9998         | 28.0112                              | 123.0296                                                |
| Eu       | t/q <sub>t</sub> =0.0828+0.027t  | 1.0000         | 37.0370                              | 56.7901                                                 |
| Ho       | t/q <sub>t</sub> =0.4107+0.0578t | 0.9997         | 17.3010                              | 61.4666                                                 |
| Yb       | t/q <sub>t</sub> =0.1515+0.0289t | 0.9999         | 34.6021                              | 90.6958                                                 |
| Lu       | t/q <sub>t</sub> =0.095+0.0237t  | 0.9998         | 42.1941                              | 84.5662                                                 |
| Y        | t/q <sub>t</sub> =0.3802+0.0608t | 0.9999         | 16.4474                              | 51.4251                                                 |
| Sc       | t/q <sub>t</sub> =0.5058+0.0687t | 0.9997         | 14.5560                              | 53.5840                                                 |

### Intra-particle diffusion model<sup>11</sup>

$$q_t = k_i t^{1/2} + C$$

Where  $k_i$  was intra-particle diffusion rate constant ( $\text{mg} \cdot \text{g}^{-1} \cdot \text{min}^{-1/2}$ ),  $C$  represented the boundary layer diffusion effect. The larger the value of  $C$ , the greater the diffusion effect of the boundary layer.

Table S3. The result of data processing according to intra-particle diffusion model

| Elements | Equation                        | Parameter      |                                                                  |        |
|----------|---------------------------------|----------------|------------------------------------------------------------------|--------|
|          |                                 | R <sup>2</sup> | $k_i$<br>$\text{mg} \cdot \text{g}^{-1} \cdot \text{min}^{-1/2}$ | C      |
| Nd       | $q_t = 35.996 + 1.4109 t^{1/2}$ | 0.6592         | 1.4109                                                           | 35.996 |
| Sm       | $q_t = 14.789 + 0.7398 t^{1/2}$ | 0.5851         | 0.7398                                                           | 14.789 |
| Eu       | $q_t = 28.686 + 0.4675 t^{1/2}$ | 0.5898         | 0.4675                                                           | 28.686 |
| Ho       | $q_t = 10.433 + 0.3864 t^{1/2}$ | 0.4838         | 0.3864                                                           | 10.433 |
| Yb       | $q_t = 22.532 + 0.6897 t^{1/2}$ | 0.5001         | 0.6897                                                           | 22.532 |
| Lu       | $q_t = 33.574 + 0.4466 t^{1/2}$ | 0.8311         | 0.4466                                                           | 33.574 |
| Y        | $q_t = 10.419 + 0.3384 t^{1/2}$ | 0.4985         | 0.3384                                                           | 10.419 |
| Sc       | $q_t = 8.7572 + 0.3277 t^{1/2}$ | 0.4386         | 0.3277                                                           | 8.7572 |

### Elovich model<sup>12</sup>

$$q_t = \frac{\ln(\alpha\beta)}{\beta} + \frac{\ln t}{\beta}$$

Where  $\alpha$  ( $\text{mg} \cdot \text{g}^{-1} \cdot \text{min}^{-1}$ ) was the initial adsorption rate constant,  $\beta$  ( $\text{mg} \cdot \text{g}^{-1} \cdot \text{min}^{-1}$ ) was a parameter related to the surface coverage of the adsorbent and the activation energy of chemical adsorption.

Table S4. The result of data processing according to Elovich model

| Elements | Equation                      | Parameter      |                                                                   |                                                                  |
|----------|-------------------------------|----------------|-------------------------------------------------------------------|------------------------------------------------------------------|
|          |                               | R <sup>2</sup> | $\alpha$<br>$\text{mg} \cdot \text{g}^{-1} \cdot \text{min}^{-1}$ | $\beta$<br>$\text{mg} \cdot \text{g}^{-1} \cdot \text{min}^{-1}$ |
| Nd       | $q_t = 26.945 \ln t + 14.218$ | 0.9612         | 45.6711                                                           | 0.03711                                                          |
| Sm       | $q_t = 14.724 \ln t + 2.5879$ | 0.9266         | 17.5533                                                           | 0.06792                                                          |
| Eu       | $q_t = 9.2842 \ln t + 21.003$ | 0.9298         | 89.1700                                                           | 0.10771                                                          |
| Ho       | $q_t = 8.2165 \ln t + 3.3692$ | 0.8744         | 12.38142                                                          | 0.12171                                                          |
| Yb       | $q_t = 14.55 \ln t + 10.074$  | 0.8899         | 29.0774                                                           | 0.06873                                                          |
| Lu       | $q_t = 7.696 \ln t + 27.774$  | 0.9867         | 284.1745                                                          | 0.12994                                                          |
| Y        | $q_t = 7.1041 \ln t + 4.3537$ | 0.8782         | 13.1118                                                           | 0.14076                                                          |
| Sc       | $q_t = 7.0795 \ln t + 4.3537$ | 0.8181         | 13.0943                                                           | 0.14125                                                          |



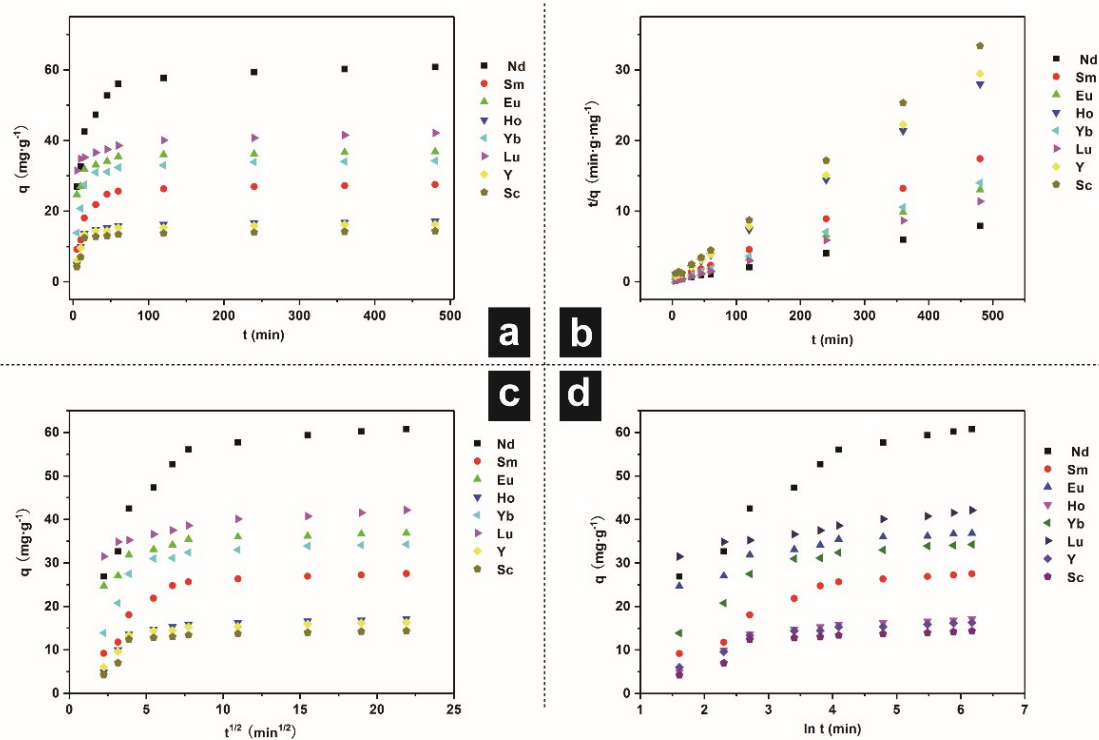

Figure S7. Different adsorption kinetic model of Fe<sub>3</sub>O<sub>4</sub>@ mSiO<sub>2</sub>-TODGA for REEs (a. pseudo-first-order, b. pseudo-second-order, c. intra-particle diffusion, d. Elovich model)

## Adsorption isotherms

### Langmuir model<sup>13</sup>

$$\frac{C_e}{q_e} = \frac{C_e}{Q_{max}} + \frac{1}{K_L Q_{max}}$$

Where  $Q_e(\text{mg}\cdot\text{g}^{-1})$  and  $C_e(\text{mg}\cdot\text{L}^{-1})$  was the amount of nanoparticles adsorbed and the concentration of REEs in the solution under the equilibrium, respectively;  $Q_{max}(\text{mg}\cdot\text{g}^{-1})$  was the saturated monolayer adsorption, and  $K_L(\text{L}\cdot\text{mg}^{-1})$  was the Langmuir constant, which is related to the binding energy of the adsorption system.

Table S5. The result of data processing according to Langmuir model

| Elements | Equation                     | Parameter      |                                           |                                         |                |
|----------|------------------------------|----------------|-------------------------------------------|-----------------------------------------|----------------|
|          |                              | R <sup>2</sup> | Q <sub>max</sub><br>(mg·g <sup>-1</sup> ) | K <sub>L</sub><br>(L·mg <sup>-1</sup> ) | R <sub>L</sub> |
| Nd       | $C_e/q_e=0.0145 C_e +0.0109$ | 0.9327         | 68.9655                                   | 1.3303                                  | 0.4291         |
| Sm       | $C_e/q_e=0.0350 C_e +0.0102$ | 0.9987         | 28.5714                                   | 3.4314                                  | 0.2256         |
| Eu       | $C_e/q_e=0.0249 C_e +0.0211$ | 0.9981         | 40.1606                                   | 1.1801                                  | 0.4586         |
| Ho       | $C_e/q_e=0.0579 C_e +0.0439$ | 0.9892         | 17.2712                                   | 1.3189                                  | 0.4312         |
| Yb       | $C_e/q_e=0.0258 C_e +0.0236$ | 0.9911         | 38.7597                                   | 1.0932                                  | 0.4777         |
| Lu       | $C_e/q_e=0.022 C_e +0.0222$  | 0.9900         | 45.4545                                   | 0.9910                                  | 0.5022         |
| Y        | $C_e/q_e=0.0568 C_e +0.0318$ | 0.9919         | 17.6056                                   | 1.7862                                  | 0.3589         |
| Sc       | $C_e/q_e=0.0674 C_e +0.0105$ | 0.9983         | 14.8368                                   | 6.4190                                  | 0.1347         |

### Freundlich model<sup>14</sup>

$$\ln(Q_e) = \ln(K_f) + \frac{1}{n} \ln(C_e)$$

where  $K_f$  and  $n$  was the Freundlich isotherm constant, respectively.  $K_f$  was related to the adsorption amount, and  $n$  was related to the strength of the adsorption. The value of  $1/n$  between 0.1-0.5 indicated that the adsorption process was favorable.

Table S6. The result of data processing according to Freundlich model

| Elements | Equation                         | Parameter      |                |        |
|----------|----------------------------------|----------------|----------------|--------|
|          |                                  | R <sup>2</sup> | K <sub>f</sub> | n      |
| Nd       | $\ln(q_e)=0.4574\ln(C_e)+3.4593$ | 0.9972         | 31.7947        | 2.1863 |
| Sm       | $\ln(q_e)=0.2941\ln(C_e)+2.7919$ | 0.9366         | 16.3120        | 3.4002 |
| Eu       | $\ln(q_e)=0.1542\ln(C_e)+3.2662$ | 0.9838         | 26.2115        | 6.4851 |
| Ho       | $\ln(q_e)=0.1808\ln(C_e)+2.3297$ | 0.9950         | 10.2794        | 5.5310 |
| Yb       | $\ln(q_e)=0.7722\ln(C_e)+2.9209$ | 0.9828         | 18.5580        | 1.2950 |
| Lu       | $\ln(q_e)=0.4854\ln(C_e)+2.8683$ | 0.9444         | 17.6071        | 2.0602 |
| Y        | $\ln(q_e)=0.6547\ln(C_e)+2.1791$ | 0.9025         | 8.8383         | 1.5274 |
| Sc       | $\ln(q_e)=0.3962\ln(C_e)+2.2898$ | 0.9429         | 9.8730         | 2.5240 |

### D-R model<sup>15</sup>

$$\ln Q_e = \ln Q_m - \beta \varepsilon^2$$

$$\varepsilon = RT \ln \left( 1 + \frac{1}{C_e} \right)$$

$$E = (2\beta)^{-0.5}$$

Where  $\beta$  was a constant ( $\text{mol}^2 \cdot \text{J}^{-2}$ ) and related to adsorption energy;  $Q_m$  was the theoretical saturated adsorption capacity ( $\text{mg} \cdot \text{g}^{-1}$ );  $\varepsilon$  was Polanyi potential;  $R$  was gas constant ( $8.314 \text{ J} \cdot \text{mol}^{-1} \cdot \text{K}^{-1}$ ),  $T$  was the absolute temperature (K);  $E$  was the average adsorption energy ( $\text{kJ} \cdot \text{mol}^{-1}$ ) and represented the energy required to transfer 1 mol of metal ions from the solution to the surface of the solid phase. The value of  $E$  could reflect whether the adsorption mechanism was a physical reaction or a chemical reaction. When  $E > 8 \text{ kJ} \cdot \text{mol}^{-1}$ , the adsorption process follows chemical adsorption, while  $E < 8 \text{ kJ} \cdot \text{mol}^{-1}$ , the adsorption process was a physical reaction.

Table S7. The result of data processing according to D-R model

| Elements | Equation                                                 | R <sup>2</sup> | Parameter                                         |                                            |                                                         |
|----------|----------------------------------------------------------|----------------|---------------------------------------------------|--------------------------------------------|---------------------------------------------------------|
|          |                                                          |                | $\beta$<br>( $\text{mol}^2 \cdot \text{J}^{-2}$ ) | E<br>( $\text{kJ} \cdot \text{mol}^{-1}$ ) | $Q_{\text{max}}$<br>( $\text{mg} \cdot \text{g}^{-1}$ ) |
| Nd       | $\ln(Q_e) = 3.6081 - 8.001 \times 10^{-9} \varepsilon^2$ | 0.9543         | $8.001 \times 10^{-9}$                            | 15.81                                      | 36.8959                                                 |
| Sm       | $\ln(Q_e) = 3.2104 - 1.137 \times 10^{-8} \varepsilon^2$ | 0.9574         | $1.137 \times 10^{-8}$                            | 13.26                                      | 24.7890                                                 |
| Eu       | $\ln(Q_e) = 3.4517 - 2.801 \times 10^{-8} \varepsilon^2$ | 0.953          | $2.801 \times 10^{-8}$                            | 8.45                                       | 31.5540                                                 |
| Ho       | $\ln(Q_e) = 2.6778 - 1.200 \times 10^{-8} \varepsilon^2$ | 0.9603         | $1.200 \times 10^{-8}$                            | 12.91                                      | 14.5530                                                 |

|    |                                                      |        |                        |       |         |
|----|------------------------------------------------------|--------|------------------------|-------|---------|
| Yb | $\ln(Q_e) = 3.4329 - 3.197 \times 10^{-8} \cdot C_e$ | 0.9578 | $3.197 \times 10^{-8}$ | 7.91  | 30.9663 |
| Lu | $\ln(Q_e) = 3.4410 - 2.000 \times 10^{-8} \cdot C_e$ | 0.9569 | $2.000 \times 10^{-8}$ | 10.00 | 31.2182 |
| Y  | $\ln(Q_e) = 2.8273 - 4.001 \times 10^{-8} \cdot C_e$ | 0.9555 | $4.001 \times 10^{-8}$ | 7.07  | 16.8998 |
| Sc | $\ln(Q_e) = 2.6359 - 1.600 \times 10^{-8} \cdot C_e$ | 0.9666 | $1.600 \times 10^{-8}$ | 11.18 | 13.9559 |

### Tempkin model <sup>16</sup>

$$Q_e = B_T \ln K_T + B_T \ln C_e$$

Where the value of the  $B_T$  was calculated from the following equation:  $B_T = (RT)/b_T$ ,  $R$  was the gas constant ( $8.314 \text{ J} \cdot \text{mol}^{-1} \cdot \text{K}^{-1}$ ),  $b_T$  was the Tempkin constant ( $\text{J} \cdot \text{mol}^{-1}$ ) and related to adsorption heat.  $K_T$  was the equilibrium binding constant ( $\text{L} \cdot \text{g}^{-1}$ ) and related to the maximum binding energy.

Table S8. The result of data processing according to Tempkin model

| Elements | Equation                        | Parameter      |                |                |
|----------|---------------------------------|----------------|----------------|----------------|
|          |                                 | R <sup>2</sup> | B <sub>T</sub> | K <sub>T</sub> |
| Nd       | $Q_e = 9.0897 \ln C_e + 37.799$ | 0.8545         | 9.0897         | 63.9718        |
| Sm       | $Q_e = 3.8971 \ln C_e + 19.61$  | 0.9702         | 3.8971         | 153.2310       |
| Eu       | $Q_e = 7.7306 \ln C_e + 21.578$ | 0.9665         | 7.7396         | 16.2485        |
| Ho       | $Q_e = 2.2484 \ln C_e + 10.392$ | 0.9805         | 2.2484         | 101.6925       |
| Yb       | $Q_e = 8.0659 \ln C_e + 20.264$ | 0.9395         | 8.0659         | 12.3333        |
| Lu       | $Q_e = 7.9296 \ln C_e + 23.234$ | 0.9650         | 7.9196         | 18.7977        |
| Y        | $Q_e = 3.4884 \ln C_e + 9.9655$ | 0.8066         | 3.4884         | 17.4049        |
| Sc       | $Q_e = 2.3076 \ln C_e + 10.189$ | 0.8240         | 2.3076         | 82.7157        |

Table S9. 16 kinds of REEs linear standard curve

| Elements |                          | R <sup>2</sup> | Liner range  |
|----------|--------------------------|----------------|--------------|
| La       | $Y = 242.396X + 190.248$ | 0.99969        | 5~1000 μg/L  |
| Ce       | $Y = 41.843X + 23.1529$  | 0.99986        | 5~1000 μg/L  |
| Pr       | $Y = 33.372X + 32.615$   | 0.99997        | 5~1000 μg/L  |
| Nd       | $Y = 29.463X + 214.024$  | 0.99781        | 5~1000 μg/L  |
| Sm       | $Y = 53.289X - 17.493$   | 0.99986        | 5~1000 μg/L  |
| Eu       | $Y = 120.374X + 23.768$  | 0.99999        | 5~1000 μg/L  |
| Gd       | $Y = 73.411X + 38.238$   | 0.99996        | 5~1000 μg/L  |
| Tb       | $Y = 49.724X + 14.738$   | 0.99995        | 5~1000 μg/L  |
| Dy       | $Y = 83.063X + 0.00$     | 0.99784        | 10~1000 μg/L |
| Ho       | $Y = 35.289X + 17.842$   | 0.99996        | 5~1000 μg/L  |
| Er       | $Y = 54.089X + 2.625$    | 0.99999        | 5~1000 μg/L  |
| Tm       | $Y = 139.274X + 34.453$  | 1.00000        | 5~1000 μg/L  |
| Yb       | $Y = 611.496X + 120.269$ | 1.00000        | 5~1000 μg/L  |

|    |                     |         |                        |
|----|---------------------|---------|------------------------|
| Lu | $Y=213.229X+1.236$  | 0.99999 | 5~1000 $\mu\text{g/L}$ |
| Y  | $Y=152.899X+74.869$ | 0.99998 | 5~1000 $\mu\text{g/L}$ |
| Sc | $Y=487.212X+5.708$  | 0.99999 | 5~1000 $\mu\text{g/L}$ |

Table S10. Comparison of the  $\text{Fe}_3\text{O}_4@\text{mSiO}_2\text{-DODGA}$  with the other conventional materials

| Entry | Materials                                 | Recycling times            | REEs            | Ref. |
|-------|-------------------------------------------|----------------------------|-----------------|------|
|       |                                           | The final adsorption ratio |                 |      |
| 1     | $\text{Fe}@CS\text{-DGA}$                 | 5/>90%                     | Pb(II)          | 28   |
| 2     | $\text{Fe}_3\text{O}_4@\text{TODGA}$      | 3/80%, 92%                 | Am(III), Pu(IV) | 29   |
| 3     | $\text{Fe}_3\text{O}_4@\text{HA-MNPs}$    | 6/95%                      | Eu(III)         | 23   |
| 4     | SBA-15-BSEA- $\text{Fe}_3\text{O}_4$ -NPs | 5/95%                      | Ce(III)         | 18   |

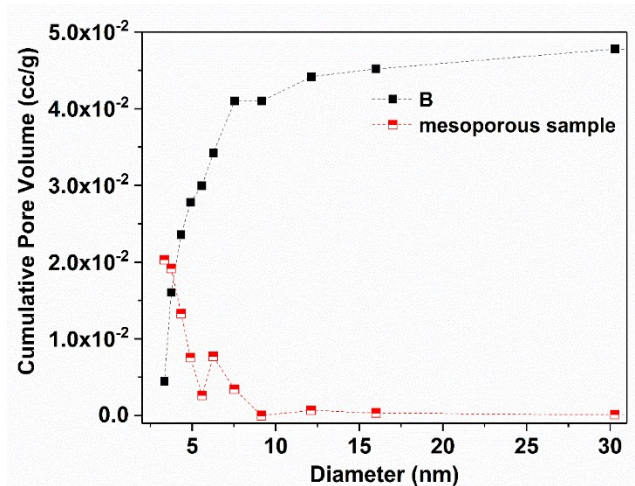

Figure S8. The pore diameter of  $\text{Fe}_3\text{O}_4@\text{mSiO}_2\text{-DODGA}$

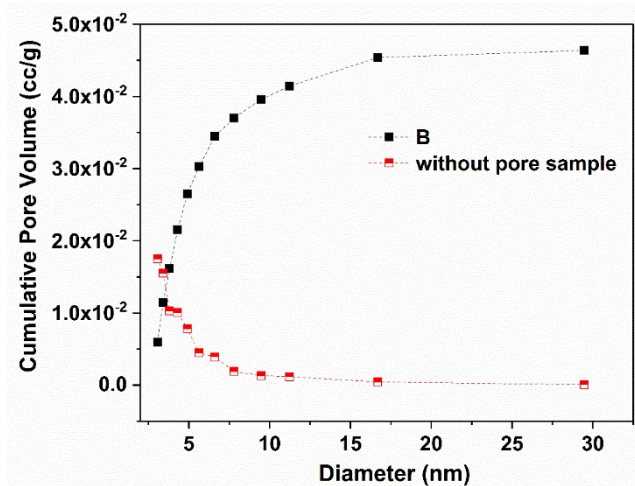

Figure S9. The pore structure of Fe<sub>3</sub>O<sub>4</sub>@SiO<sub>2</sub>

## Reference

- 1 S. W. Cao, Y. J. Zhu, J. Chang, *New J. Chem.*, 2008, **32**, 1526-1530.
- 2 J. Liu, Y. Sun, Y. Deng, Y. Zou, C. Li, X. Guo, L. Xiong, Y. Gao, F. Li and D. Zhao, *Angew. Chem.*, 2009, **48**, 5875-5879.
- 3 D. Liu, Y. Li, J. Deng and W. Yang, *React. Funct. Polym.*, 2011, **71**, 1040-1044.
- 4 J.P. Yang, F. Zhang, Y. R. Chen, S. Qian, P. Hu, W. Li, Y. H. Deng, Y. Fang, L. Han, M. Luqman, D. Y. Zhao, *Chem. Commun.*, 2011, **47**, 11618-11620.
- 5 Y. H. He, Y.Y. Huang, Y.L. Jin, X.J. Liu, G.Q. Liu and R. Zhao, *ACS Appl. Mater. Interfaces*, 2014, **6**, 9634-9642.
- 6 E. P. Horwitz, D. R. McAlister, A. H. Bond and R. E. Barrans Jr, *Solvent Extr. Ion Exc.*, 2005, **23**, 319-344.
- 7 G. Kantin, E. Chupakhin, D. Dar'in and M.Krasavin. *Tetrahedron Lett.*, 2017, **58**, 3160-3163.
- 8 M. Bessodes, N. Mignet. *Nanotechnology for Nucleic Acid Delivery*, 2013, **948**, 67-84.
- 9 N. A. Oladoja, C. O. Aboluwoye, Y. B. Oladimeji, *Turk J Eng Environ Sci*, 2008, **32**, 303-312.
- 10 Y.S. Ho, G. McKay, Sorption of dye from aqueous solution by peat. *Chem Eng J.*, 1998, **70**, 115-124
- 11 M. K. Sureshkumar, D. Das, M. B. Mallia and P. C. Gupta, *J. Hazard. Mater.*, 2010, **184**, 65-72.
- 12 S. H. Chein, W. R. Clayton. *Soil Sci. Soc. Am. J.*, 1980, **44**, 265-268.
- 13 E.,Repo, J. K. Warchol, T. A. Kurniawan and MET Sillanpää, *Chem Eng. J.* 2010, **161**, 73-82.
- 14 M. Jain, V. K.Garg, K. Kadirvelu, *J. Hazard. Mater.*, 2009, **162**, 365-372.
- 15 X.J. Hu, J.S. Wang, Y. G. Liu, X. Li, G.M. Zeng, Z. L. Bao, X. X. Zeng, A. W. Chen and F. Long, *J. Hazard. Mater.*, 2011, **185**, 306-314.
- 16 A. Sari, M. Tuzen, *J. Hazard. Mater.*, 2009, **164**, 1004-1011.
